# Supplementary material for: Measured greenhouse gas budgets challenge emission savings from palm-oil biodiesel
Source: PubMed Central journal article supplement (PMC7046764; doi:10.1038/s41467-020-14852-6), 2020-02-27
Supplement: 41467_2020_14852_MOESM1_ESM.pdf [file 41467_2020_14852_MOESM1_ESM.pdf]

**Supplementary Information for**

**MEASURED GREENHOUSE GAS BUDGETS CHALLENGE  
EMISSION SAVINGS FROM PALM-OIL BIODIESEL**

by Meijide *et al.*

## Supplementary Figures

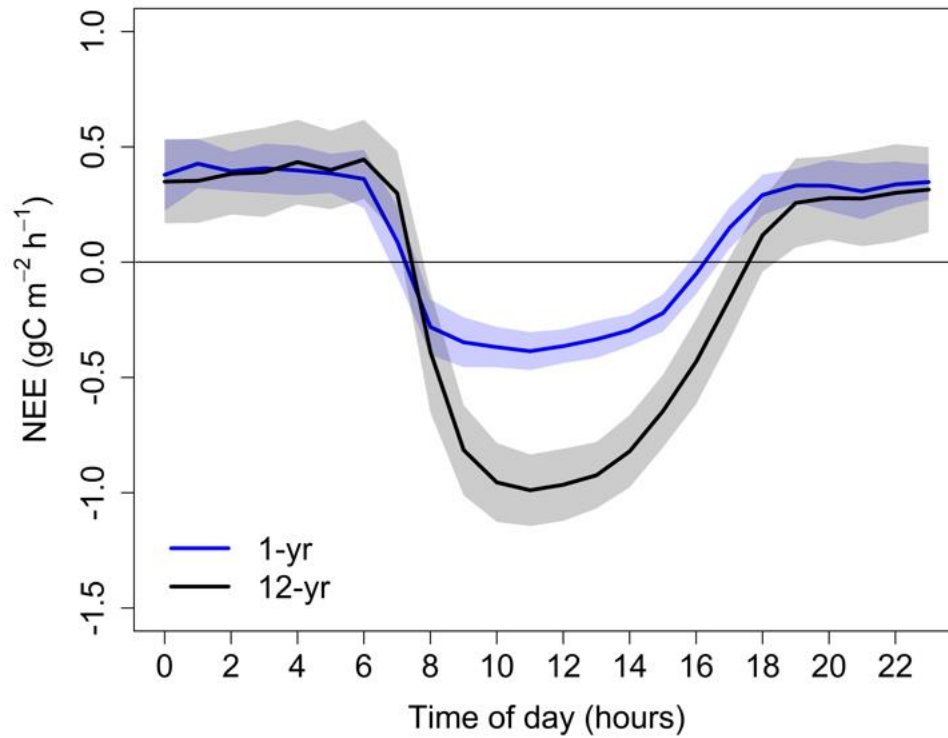

**Supplementary Figure 1: Mean diurnal cycles of net ecosystem exchange.** Mean diurnal cycles of net ecosystem exchange (NEE) for the 1-year old (1-yr; blue) and 12-year old (12-yr; black) oil palm plantations. Shaded areas indicate standard deviations. Negative and positive fluxes indicate CO<sub>2</sub> uptake and emission, respectively.

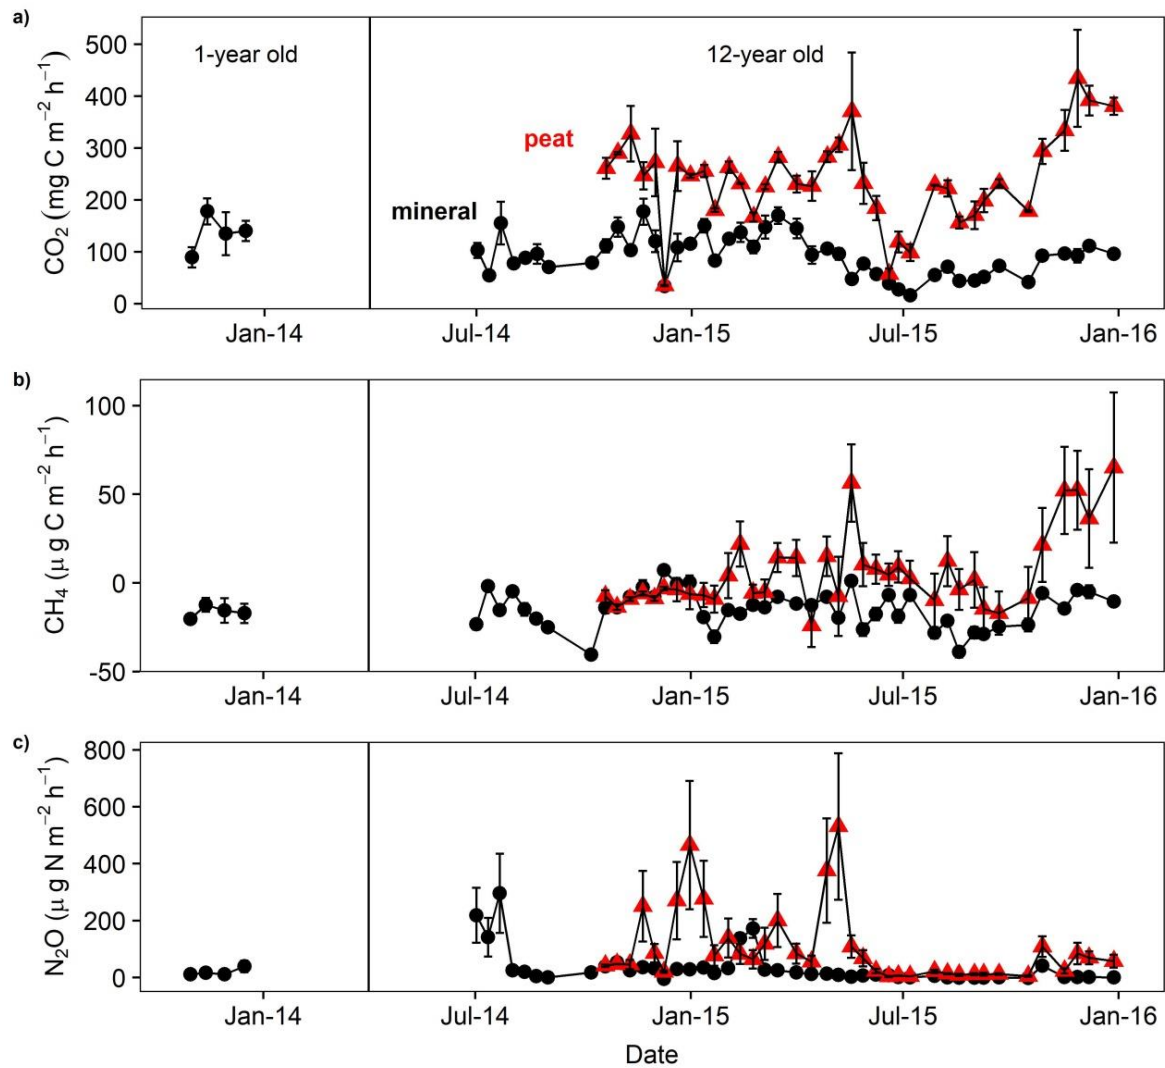

**Supplementary Figure 2: Soil greenhouse gas fluxes from plantations.** Soil greenhouse gas fluxes from young and mature (1- and 12-year old) oil palm plantations on mineral and peat soils. Mean soil respiration (a;  $\text{CO}_2$ ) and methane (b;  $\text{CH}_4$ ) and nitrous oxide (c;  $\text{N}_2\text{O}$ ) fluxes in the 1-year old (left side) and 12-year old (right side) plantations. Data in the 12-year old plantation include measurements on mineral (black dots) and adjacent peat soils (red triangles). Bars represent standard errors, with  $n = 3$  for the 1-year old plantation,  $n = 4$  for mineral soils in the 12-year old plantation and  $n = 3$  for peat soils in the 12-year old plantation.

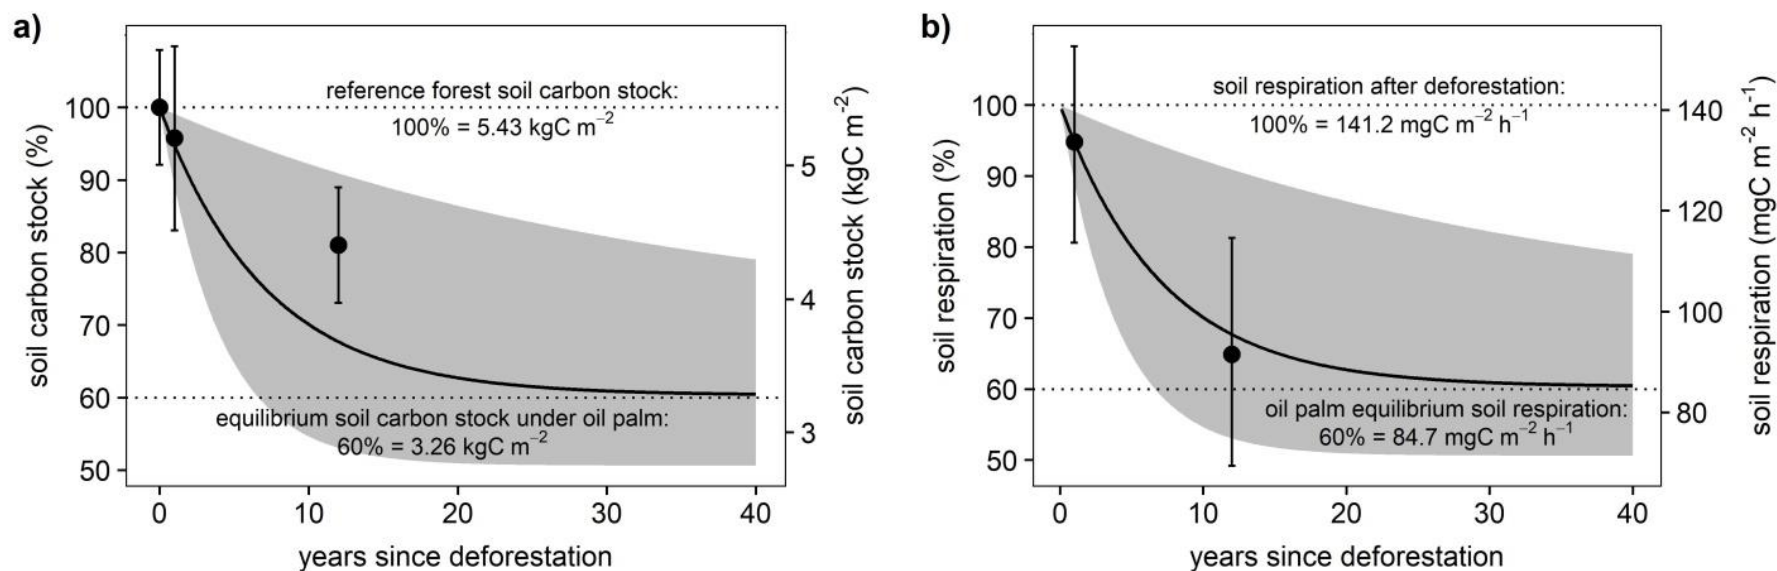

**Supplementary Figure 3: Carbon stocks and soil respiration following deforestation.** Evolution of soil carbon stocks (a), expressed as a percentage of the original soil carbon stock in reference forest (left axis) and as absolute values (right axis). Measurements in reference forest in the study region were performed by Guillaume et al.,<sup>1</sup> and were used to calibrate the soil organic decay function by Van Straaten et al.,<sup>2</sup>. This decay function was used to calculate the equilibrium soil carbon stock under oil palm plantations, which is reached approx. 30-35 years after deforestation. Evolution of soil respiration (b), expressed as a percentage of the soil respiration right after deforestation (left axis) and as absolute values (right axis). The measurements in the 1-year old plantation were used to fit the data to the decay function by Van Straaten et al.,<sup>2</sup>. This decay function was used to calculate equilibrium soil respiration. In both figures, lines correspond to decay functions, black dots to measured values and error bars to standard errors.

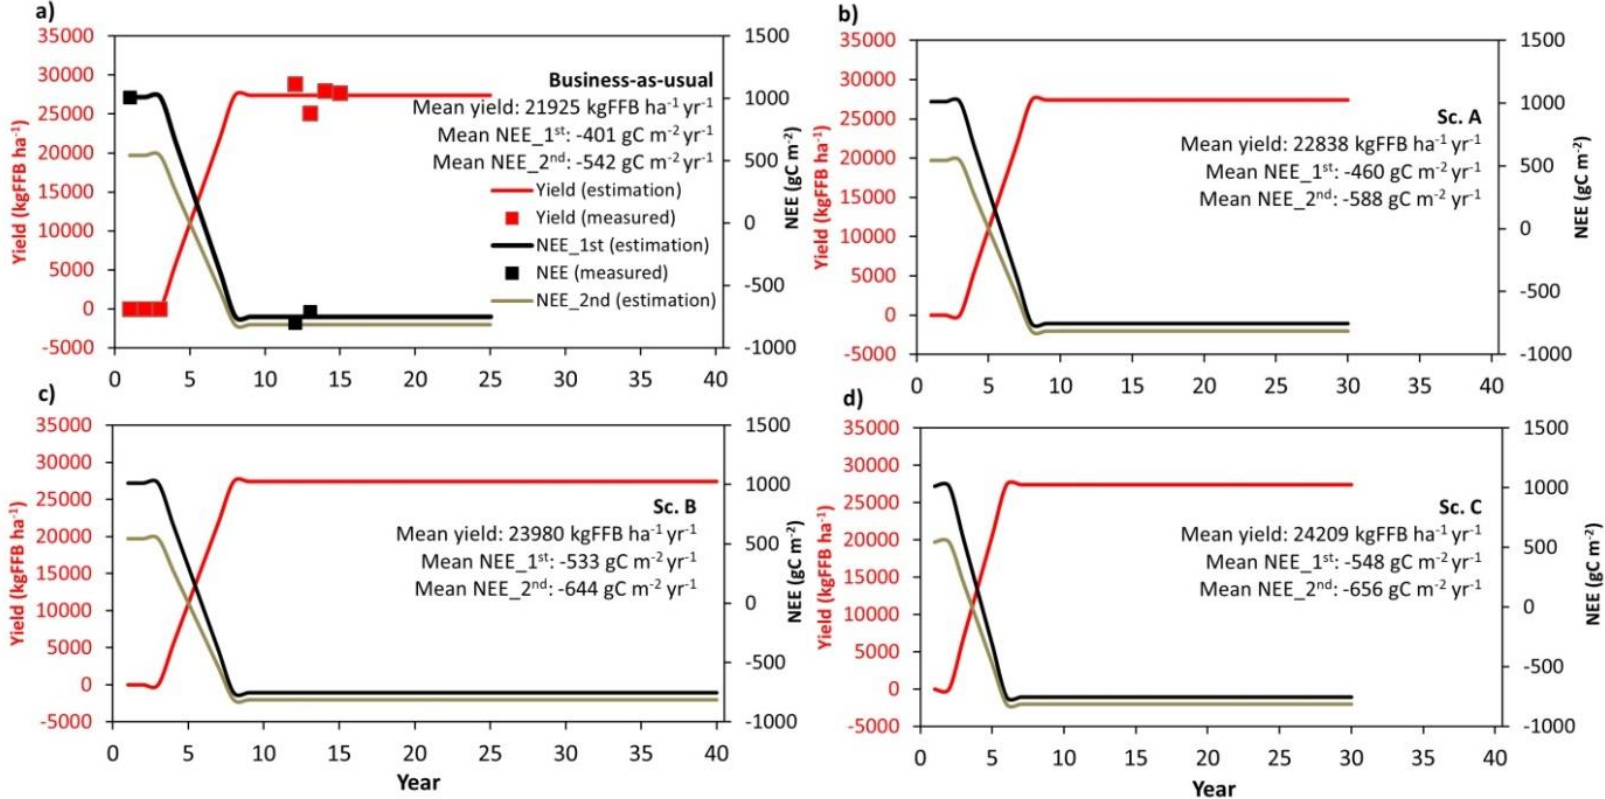

**Supplementary Figure 4: Yield and net ecosystem exchange in the rotation cycles.** Trends in yield (red) and net ecosystem exchange (NEE, black) over the life cycle of oil palm plantations under different management scenarios. All scenarios assume oil palm cultivation on mineral soils. Business-as-usual assumes a plantation life cycle of 25 years (panel a), while the alternative management scenarios assume extensions of the life cycle to 30 years (panel b, scenario A), 40 years (panel c, scenario B) and to 30 years with the use of earlier-yielding oil palm varieties (panel d, scenario C). Scenarios for NEE are presented for both first and second rotation cycle plantations. Negative and positive NEE values indicate CO<sub>2</sub> uptake and emission, respectively. Data points are measured values whereas lines indicate life cycle estimations. Yield was assumed to be equal in first and second rotation cycle plantations.

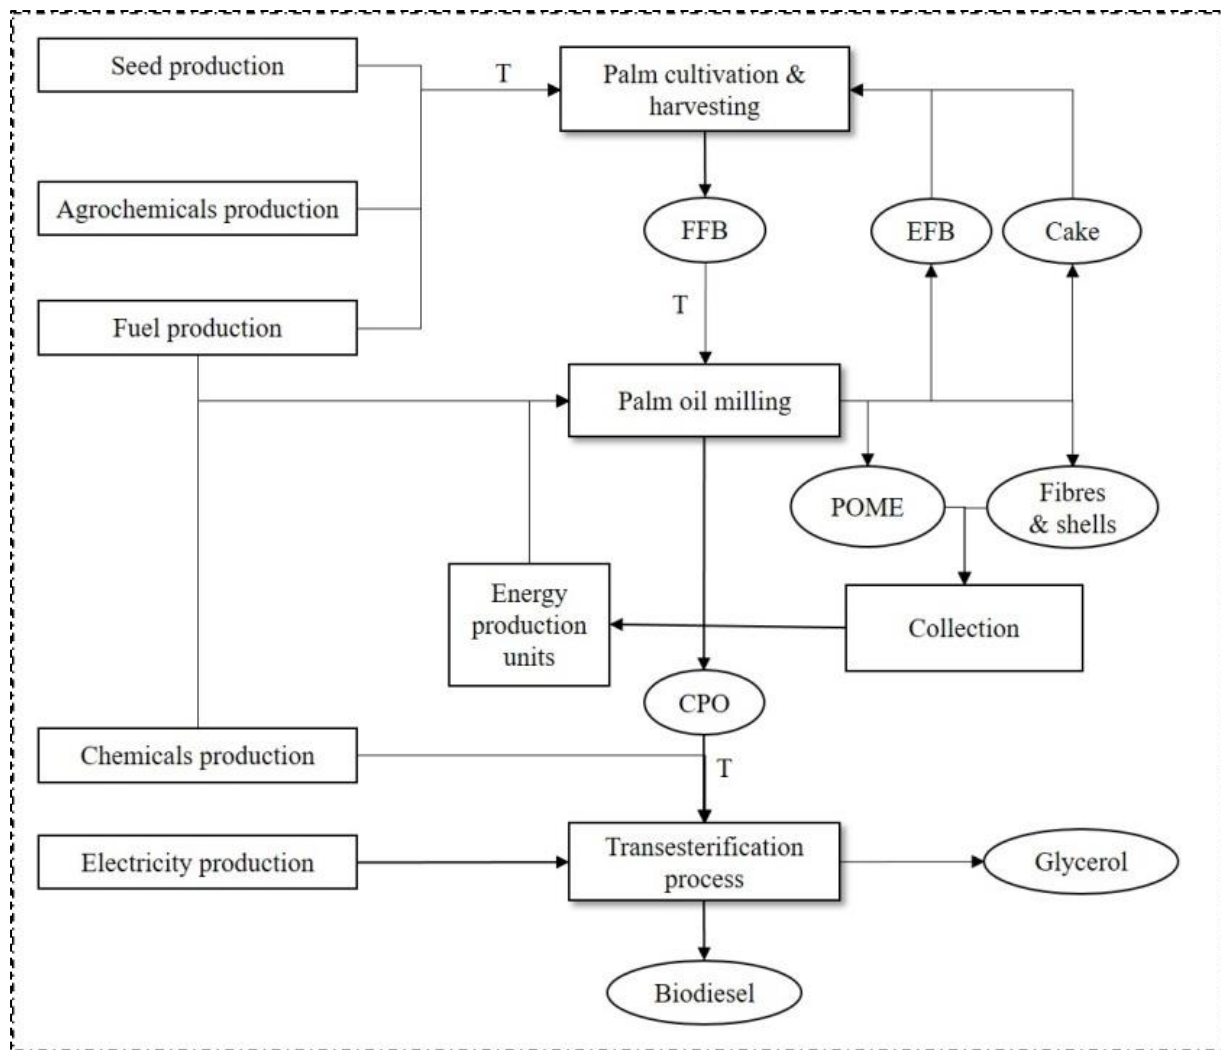

**Supplementary Figure 5: System boundaries for palm-oil biodiesel production.** The system boundaries of our analysis are represented in this simplified scheme by the outer dashed box. Circles represent products while boxes represent processes. Land-use change related emissions are excluded in the scheme. FFB - fresh fruit bunches, EFB - empty fruit bunches, CPO - crude palm oil, and T - transport. Cake is the residue left after oil is extracted from the kernel.

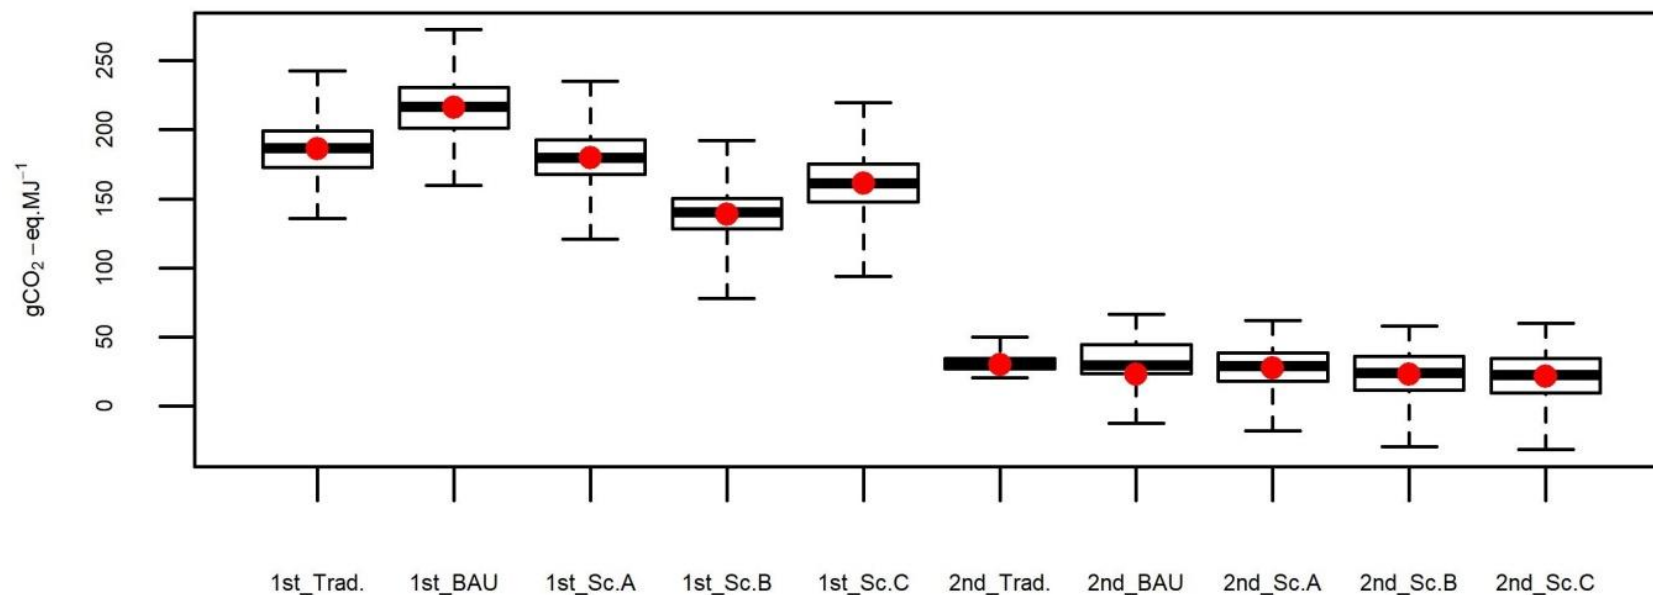

**Supplementary Figure 6: Uncertainty analysis for the different scenarios.** Uncertainties in the greenhouse gas emissions (in  $\text{gCO}_2\text{-eq. MJ}^{-1}$ ) for the different scenarios Emission ranges in  $\text{g CO}_2\text{-equivalents per Megajoule (gCO}_2\text{-eq.MJ}^{-1})$  for the first (1st\_) and second (2nd\_) rotation cycles for the traditional Life Cycle Analysis (Trad.), business-as-usual (BAU) and the three additional scenarios: scenario A (Sc.A; 30-yr cultivation cycle), scenario B (Sc. B; 40-yr cultivation cycle), and scenario C (Sc. C; 30-yr cultivation cycle with earlier-yielding varieties). These uncertainties include those derived from the different processes, i.e. cultivation, oil milling, processing, use and land-use change related emissions, estimated from Monte Carlo analysis. Boxplots indicate the lower quartile, median and upper quartile, with whiskers extending to the minimum and maximum values. Red dots indicate the estimated mean values.

## Supplementary Tables

**Supplementary Table 1: Ecosystem carbon fluxes for young and mature plantations.** Net ecosystem productivity (NEP) is estimated as net ecosystem exchange (NEE) plus yield; yield in the young plantation was zero. NEP is expressed for both carbon (NEP<sub>C</sub>) and carbon dioxide (NEP<sub>CO2</sub>). Positive values indicate a carbon source from the ecosystem to the atmosphere and negative values a carbon uptake. Errors in NEE and NEP represent 5% of measured fluxes as explained in the Methods section.

| C fluxes from (positive values) and to (negative value) the ecosystem |                                         |       |                                                            |                    |
|-----------------------------------------------------------------------|-----------------------------------------|-------|------------------------------------------------------------|--------------------|
|                                                                       | NEE                                     | Yield | NEP <sub>C</sub>                                           | NEP <sub>CO2</sub> |
|                                                                       | (g C m <sup>-2</sup> yr <sup>-1</sup> ) |       | (g CO <sub>2</sub> -eq. m <sup>-2</sup> yr <sup>-1</sup> ) |                    |
| Young plantation (1-year old)                                         |                                         |       |                                                            |                    |
| 8 months                                                              | 636 ± 32                                | ---   | ---                                                        | ---                |
| 1 year                                                                | 1012 ± 51                               | ---   | 1012 ± 51                                                  | 3711 ± 186         |
| Mature plantation (12-year old)                                       |                                         |       |                                                            |                    |
| Year 1                                                                | -799 ± 40                               | 851   | 52 ± 40                                                    | 192 ± 146          |
| Year 2                                                                | -709 ± 35                               | 949   | 240 ± 35                                                   | 880 ± 130          |



**Supplementary Table 2: Soil and ecosystem greenhouse gas fluxes.** Mean and annual ( $\pm$  SE) soil nitrous oxide ( $\text{N}_2\text{O}$ ) and methane ( $\text{CH}_4$ ) fluxes, and carbon dioxide ( $\text{CO}_2$ ) fluxes from the soil (soil respiration; SR) are provided in  $\text{CO}_2$  equivalents ( $\text{CO}_2\text{-eq.}$ ) Net ecosystem productivity ( $\text{NEP}_{\text{CO}_2}$ ) and the contribution to the net global warming potential ( $\text{GWP}_{\text{net}}$ ) are provided at the ecosystem (Eco) and soil (Soil) levels, for the 1- and 12- year old oil palm plantation as well as for mineral and peat soils in the 12- year old oil palm plantation. For the 1- year old plantation, the less frequent temporal measurements did not allow for estimating annual fluxes. Therefore, we used the soil  $\text{N}_2\text{O}$  emissions measured in smallholder plantations in the study area<sup>21</sup>. Soil  $\text{CH}_4$  fluxes from the 1-year old plantation were assumed to be the same as in the mature plantation. For the peat soils of the 12- year old oil palm plantation, we did not measure  $\text{CO}_2$  fluxes at the ecosystem level, and therefore fluxes were estimated as  $\text{NEP}_{\text{CO}_2} = \text{Net ecosystem exchange (NEE)}_{\text{mineral}} - \text{SR}_{\text{mineral}} + \text{SR}_{\text{peat}} + \text{Yield}$ . Different letters in mean fluxes indicate significant differences at  $P < 0.01$  according to the Mann-Whitney U test.

|                                                | <b>N<sub>2</sub>O</b>                                      |                                                            | <b>CH<sub>4</sub></b>                                        |                                           |                                           | <b>CO<sub>2</sub></b>                                        |                                           |                                           | <b>GWP<sub>net</sub></b>                                     |                                                                  |                                                                  |                                                                  |
|------------------------------------------------|------------------------------------------------------------|------------------------------------------------------------|--------------------------------------------------------------|-------------------------------------------|-------------------------------------------|--------------------------------------------------------------|-------------------------------------------|-------------------------------------------|--------------------------------------------------------------|------------------------------------------------------------------|------------------------------------------------------------------|------------------------------------------------------------------|
|                                                | mean                                                       | annual                                                     | mean                                                         | annual                                    | mean                                      | annual                                                       | SR                                        | NEP <sub>CO2</sub>                        | Eco                                                          | Soil                                                             |                                                                  |                                                                  |
|                                                | N                                                          | N                                                          | GWP <sub>N2O</sub>                                           | C                                         | C                                         | GWP <sub>CH4</sub>                                           | C                                         | C                                         | GWP <sub>CO2</sub>                                           |                                                                  |                                                                  |                                                                  |
|                                                | (µgN <sub>2</sub> O-N<br>m <sup>-2</sup> h <sup>-1</sup> ) | (gN <sub>2</sub> O-N<br>m <sup>-2</sup> yr <sup>-1</sup> ) | (gCO <sub>2</sub> -eq.<br>m <sup>-2</sup> yr <sup>-1</sup> ) | (µgC<br>m <sup>-2</sup> h <sup>-1</sup> ) | (gC<br>m <sup>-2</sup> yr <sup>-1</sup> ) | (gCO <sub>2</sub> -eq.<br>m <sup>-2</sup> yr <sup>-1</sup> ) | (mgC<br>m <sup>-2</sup> h <sup>-1</sup> ) | (gC<br>m <sup>-2</sup> yr <sup>-1</sup> ) | (gCO <sub>2</sub> -eq.<br>m <sup>-2</sup> yr <sup>-1</sup> ) | (gCO <sub>2</sub> -<br>eq.<br>m <sup>-2</sup> yr <sup>-1</sup> ) | (gCO <sub>2</sub> -<br>eq.<br>m <sup>-2</sup> yr <sup>-1</sup> ) | (gCO <sub>2</sub> -<br>eq.<br>m <sup>-2</sup> yr <sup>-1</sup> ) |
| 1-yr old;<br>Mineral<br>(n = 4)                | 19.7 ± 7.9 <sup>a</sup>                                    | 0.11 ± 0.05 <sup>I</sup>                                   | 51.5 ± 23.4                                                  | -17.0 ± 2.2 <sup>a</sup>                  | -0.13 ± 0.02                              | -4.3 ± 0.7                                                   | 133.9 ± 19.0 <sup>a</sup>                 | ---                                       | ---                                                          | 3711 ± 186 <sup>IV</sup>                                         | 3758 ± 187                                                       | ---                                                              |
| 12-yr old;<br>Mineral<br>(n = 45) <sup>2</sup> | 31.1 ± 21.2 <sup>a</sup>                                   | 0.33 ± 0.17 <sup>II</sup>                                  | 154.5 ± 79.6                                                 | -14.7 ± 4.6 <sup>a</sup>                  | -0.13 ± 0.02                              | -4.3 ± 0.7                                                   | 91.7 ± 22.1 <sup>a</sup>                  | 885 ± 173                                 | 3245 ± 634                                                   | 536 ± 344 <sup>IV</sup>                                          | 686 ± 353                                                        | 3395 ± 639                                                       |
| 12-yr old;<br>Peat<br>(n = 37) <sup>3</sup>    | 104.4 ± 93.6 <sup>b</sup>                                  | 0.95 ± 0.87 <sup>III</sup>                                 | 444.9 ± 407.4                                                | 6.2 ± 24.0 <sup>b</sup>                   | 0.00 ± 0.18                               | 0.0 ± 6.0                                                    | 239.8 ± 46.1 <sup>b</sup>                 | 1969 ± 227                                | 7220 ± 832                                                   | 4511 ± 1071                                                      | 4596 ± 1146                                                      | 7665 ± 927                                                       |

<sup>I</sup>Data from Hassler et al., 2017<sup>3</sup>.

<sup>II</sup>Annual fluxes calculated from measurements from 2-07-2014 until 27-06-2015.

<sup>III</sup>Annual fluxes calculated from measurements from 20-10-2014 until 28-10-2015.

<sup>IV</sup>Value ± uncertainty estimated via bootstrapping approaches as explained in Meijide et al., 2017<sup>4</sup>.

**Supplementary Table 3: Detailed greenhouse gas emissions for all scenarios.** Direct and indirect greenhouse gas emissions (gCO<sub>2</sub>-eq. MJ<sup>-1</sup>) over the life cycle of palm-oil biodiesel from first-rotation cycle and second-rotation cycle oil palm plantations. Traditional life cycle analysis (LCA), which does not include any biogenic carbon dioxide (CO<sub>2</sub>) emissions occurring along the life cycle (i.e. the sinks during cultivation and the emissions produced from biological products: fibers and shells, palm oil milling effluent - POME - and biodiesel combustion). Business-as-Usual includes the ecosystem CO<sub>2</sub> and methane fluxes (combined as CO<sub>2</sub>-eq. under “ecosystem emissions”), as well as nitrous oxide (N<sub>2</sub>O) measured in the field during the cultivation phase and the biogenic CO<sub>2</sub> released along the different phases of the life cycle. 1<sup>st</sup> and 2<sup>nd</sup> rotation cycles differ in ecosystems emissions and regarding the inclusion of land-use change related emissions, which are only considered in the 1<sup>st</sup> rotation cycle; all further emissions are considered to be identical. Traditional LCA and Business-as-usual consider a rotation cycle of 25 years. Scenario A considers an expansion of the oil palm life cycle to 30 years. Scenario B considers an expansion of the oil palm to 40 years. Scenario C takes into account oil palm life cycle to 30 years and early yielding palm varieties. The table is divided in four stages: oil palm cultivation, palm oil milling, biodiesel production, and biodiesel use. No biogenic emissions from palm-oil product use are considered in the traditional LCA. Negative values represent CO<sub>2</sub> sinks.

| Phase                                 | Inputs                                    | Traditional LCA | Business as Usual | Business as Usual - allocation by revenue | Scenario A (30 years) | Scenario B (40 years) | Scenario C (30 years + early yielding) |
|---------------------------------------|-------------------------------------------|-----------------|-------------------|-------------------------------------------|-----------------------|-----------------------|----------------------------------------|
| gCO <sub>2</sub> -eq.MJ <sup>-1</sup> |                                           |                 |                   |                                           |                       |                       |                                        |
| Cultivation                           | N-Fertilizers                             | 9.6             | 9.6               | 9.1                                       | 9.4                   | 9.2                   | 9.1                                    |
|                                       | Phosphate-Fertilizers                     | 1.1             | 1.1               | 1.0                                       | 1.0                   | 1.0                   | 1.0                                    |
|                                       | Potassium-Fertilizers                     | 0.5             | 0.5               | 0.5                                       | 0.5                   | 0.5                   | 0.5                                    |
|                                       | Glyphosate                                | 0.2             | 0.2               | 0.2                                       | 0.2                   | 0.2                   | 0.2                                    |
|                                       | Labours                                   | 2.9             | 2.9               | 2.8                                       | 2.8                   | 2.7                   | 2.6                                    |
|                                       | Transport                                 | 0.2             | 0.2               | 0.2                                       | 0.2                   | 0.2                   | 0.2                                    |
|                                       | N <sub>2</sub> O direct emissions         | 6.9             | 6.9               | 6.5                                       | 6.8                   | 6.6                   | 6.7                                    |
|                                       | Ecosystem emissions 1 <sup>st</sup> cycle | ---             | -76.8             | -72.6                                     | -84.5                 | -93.3                 | -95.0                                  |
|                                       | Ecosystem emissions 2 <sup>nd</sup> cycle | ---             | -103.6            | ---                                       | -107.9                | -112.7                | -113.6                                 |
|                                       | <b>Subtotal 1<sup>st</sup> cycle</b>      |                 | <b>21.4</b>       | <b>-55.3</b>                              | <b>-52.3</b>          | <b>-63.5</b>          | <b>-72.9</b>                           |

|                                   |                                                 |              |              |              |              |              |              |
|-----------------------------------|-------------------------------------------------|--------------|--------------|--------------|--------------|--------------|--------------|
|                                   | <b>Subtotal<br/>2<sup>nd</sup> cycle</b>        | <b>21.4</b>  | <b>-82.4</b> | <b>---</b>   | <b>-86.9</b> | <b>-92.3</b> | <b>-93.2</b> |
| Oil Milling                       | Hexane and other chemicals                      | 0.1          | 0.1          | 0.1          | 0.1          | 0.1          | 0.1          |
|                                   | Fibers and shell                                | ---          | 29.7         | 28.8         | 29.7         | 29.7         | 29.7         |
|                                   | Diesel                                          | 0.5          | 0.5          | 0.5          | 0.5          | 0.5          | 0.5          |
|                                   | POME                                            | ---          | 1.8          | 1.8          | 1.8          | 1.8          | 1.8          |
|                                   | Transport                                       | 0.0          | 0.0          | 0.0          | 0.0          | 0.0          | 0.0          |
|                                   | BoP                                             | 0.7          | 0.7          | 0.0          | 0.7          | 0.7          | 0.7          |
|                                   | <b>Subtotal</b>                                 | <b>1.2</b>   | <b>32.7</b>  | <b>31.2</b>  | <b>32.7</b>  | <b>32.7</b>  | <b>32.7</b>  |
| Production                        | Methanol and other chemicals                    | 2.5          | 2.5          | 2.2          | 2.5          | 2.5          | 2.5          |
|                                   | Electricity                                     | 4.0          | 4.0          | 3.5          | 4.0          | 4.0          | 4.0          |
|                                   | Transport                                       | 0.6          | 0.6          | 0.6          | 0.6          | 0.6          | 0.6          |
|                                   | BoP                                             | 0.1          | 0.1          | 0.1          | 0.1          | 0.1          | 0.1          |
|                                   | <b>Subtotal</b>                                 | <b>7.2</b>   | <b>7.2</b>   | <b>6.3</b>   | <b>7.2</b>   | <b>7.2</b>   | <b>7.2</b>   |
| Use                               | Biodiesel                                       | ---          | 74.7         | 74.7         | 74.7         | 74.7         | 74.7         |
|                                   | <b>Subtotal</b>                                 | <b>---</b>   | <b>74.7</b>  | <b>74.7</b>  | <b>74.7</b>  | <b>74.7</b>  | <b>74.7</b>  |
| Land-use change related emissions | Land-use change                                 | 132.6        | 132.6        | 125.4        | 106.1        | 75.8         | 100.1        |
|                                   | Foregone sequestration                          | 23.7         | 23.7         | 22.4         | 22.7         | 21.6         | 21.4         |
|                                   | <b>Subtotal</b>                                 | <b>156.3</b> | <b>156.3</b> | <b>176.1</b> | <b>128.8</b> | <b>97.4</b>  | <b>121.5</b> |
| TOTAL                             | Cultivation                                     | 21.4         | 21.4         | 20.3         | 21.0         | 20.4         | 20.3         |
|                                   | Sinks<br>1 <sup>st</sup> cycle                  | ---          | -76.8        | -72.6        | -84.5        | -93.3        | -95.0        |
|                                   | Sinks<br>2 <sup>nd</sup> cycle                  | ---          | -103.8       | ---          | -107.9       | -112.7       | -113.6       |
|                                   | Oil Milling                                     | 1.2          | 32.7         | 31.2         | 32.7         | 32.7         | 32.7         |
|                                   | Processing                                      | 7.2          | 7.2          | 6.3          | 7.2          | 7.2          | 7.2          |
|                                   | Use                                             | ---          | 74.7         | 74.7         | 74.7         | 74.7         | 74.7         |
|                                   | Land-use                                        | 156.3        | 156.3        | 147.8        | 128.8        | 97.4         | 121.5        |
|                                   | <b>Net emissions<br/>1<sup>st</sup> cycle</b>   | <b>186.2</b> | <b>215.6</b> | <b>207.6</b> | <b>179.9</b> | <b>139.1</b> | <b>161.5</b> |
|                                   | <b>Net emissions<br/>2<sup>nd</sup> cycle</b>   | <b>29.9</b>  | <b>32.5</b>  | <b>---</b>   | <b>27.6</b>  | <b>22.6</b>  | <b>21.3</b>  |
|                                   | <b>GHG savings (%)<br/>1<sup>st</sup> cycle</b> | <b>-98</b>   | <b>-129</b>  | <b>-121</b>  | <b>-91</b>   | <b>-48</b>   | <b>-72</b>   |
|                                   | <b>GHG savings (%)<br/>2<sup>nd</sup> cycle</b> | <b>68</b>    | <b>65</b>    | <b>---</b>   | <b>71</b>    | <b>76</b>    | <b>77</b>    |

**Supplementary Table 4: Main cultivation parameters considered in the scenarios.** Description of the main parameters considered during the cultivation phase in the business-as-usual scenario and the alternative management scenarios to minimize greenhouse gas emissions: A (30-yr cultivation cycle), B (40-yr cultivation cycle), and C (30-yr cultivation cycle with early yielding varieties), both for first- and second-rotation cycle oil palm plantations. For yield, fertilizers and herbicide applications the presented values are the values for the indicated years along the rotation cycle, as well as the yearly means for the whole life cycle. Management similar to smallholder plantations during the non-productive periods and similar to intensively-managed plantations during the productive periods are assumed.

| Scenario          | 1 <sup>st</sup> year production | Plateau year | Life time (years) | Year        | Yield (kg ha <sup>-1</sup> yr <sup>-1</sup> ) | N-fertilizer (kgN ha <sup>-1</sup> yr <sup>-1</sup> ) | K-fertilizer (kgK ha <sup>-1</sup> yr <sup>-1</sup> ) | P-fertilizer (kgP ha <sup>-1</sup> yr <sup>-1</sup> ) | Glyphosate (ml ha <sup>-1</sup> yr <sup>-1</sup> ) |
|-------------------|---------------------------------|--------------|-------------------|-------------|-----------------------------------------------|-------------------------------------------------------|-------------------------------------------------------|-------------------------------------------------------|----------------------------------------------------|
| Business-as-usual | 4                               | 8            | 25                | 1-3         | 0                                             | 88                                                    | 73                                                    | 38                                                    | 0                                                  |
|                   |                                 |              |                   | 4           | 5841                                          | 110                                                   | 102                                                   | 40                                                    | 450                                                |
|                   |                                 |              |                   | 5           | 10962                                         | 132                                                   | 132                                                   | 43                                                    | 900                                                |
|                   |                                 |              |                   | 6           | 16444                                         | 153                                                   | 161                                                   | 45                                                    | 1350                                               |
|                   |                                 |              |                   | 7           | 21925                                         | 174                                                   | 191                                                   | 48                                                    | 1800                                               |
|                   |                                 |              |                   | 8-25        | 27406                                         | 196                                                   | 220                                                   | 50                                                    | 2250                                               |
|                   |                                 |              |                   | <b>mean</b> | <b>21925</b>                                  | <b>174.4</b>                                          | <b>190.6</b>                                          | <b>47.6</b>                                           | <b>1800</b>                                        |
| Scenario A        | 4                               | 8            | 30                | 1-3         | 0                                             | 88                                                    | 73                                                    | 38                                                    | 0                                                  |
|                   |                                 |              |                   | 4           | 5841                                          | 110                                                   | 102                                                   | 40                                                    | 450                                                |
|                   |                                 |              |                   | 5           | 10962                                         | 132                                                   | 132                                                   | 43                                                    | 900                                                |
|                   |                                 |              |                   | 6           | 16444                                         | 153                                                   | 161                                                   | 45                                                    | 1350                                               |
|                   |                                 |              |                   | 7           | 21925                                         | 174                                                   | 191                                                   | 48                                                    | 1800                                               |
|                   |                                 |              |                   | 8-30        | 27406                                         | 196                                                   | 220                                                   | 50                                                    | 2250                                               |
|                   |                                 |              |                   | <b>mean</b> | <b>22838</b>                                  | <b>178.0</b>                                          | <b>195.5</b>                                          | <b>48.0</b>                                           | <b>1875</b>                                        |
| Scenario B        | 4                               | 8            | 40                | 1-3         | 0                                             | 88                                                    | 73                                                    | 38                                                    | 0                                                  |
|                   |                                 |              |                   | 4           | 5841                                          | 110                                                   | 102                                                   | 40                                                    | 450                                                |
|                   |                                 |              |                   | 5           | 10962                                         | 132                                                   | 132                                                   | 43                                                    | 900                                                |
|                   |                                 |              |                   | 6           | 16444                                         | 153                                                   | 161                                                   | 45                                                    | 1350                                               |
|                   |                                 |              |                   | 7           | 21925                                         | 174                                                   | 191                                                   | 48                                                    | 1800                                               |
|                   |                                 |              |                   | 8-40        | 27406                                         | 196                                                   | 220                                                   | 50                                                    | 2250                                               |
|                   |                                 |              |                   | <b>mean</b> | <b>23980</b>                                  | <b>182.5</b>                                          | <b>201.6</b>                                          | <b>48.5</b>                                           | <b>1969</b>                                        |
| Scenario C        | 3                               | 6            | 30                | 1-2         | 0                                             | 88                                                    | 73                                                    | 38                                                    | 0                                                  |
|                   |                                 |              |                   | 3           | 6852                                          | 115                                                   | 110                                                   | 41                                                    | 563                                                |
|                   |                                 |              |                   | 4           | 13703                                         | 142                                                   | 147                                                   | 44                                                    | 1125                                               |
|                   |                                 |              |                   | 5           | 20555                                         | 170                                                   | 183                                                   | 47                                                    | 1688                                               |
|                   |                                 |              |                   | 6-30        | 27406                                         | 196                                                   | 220                                                   | 50                                                    | 2250                                               |
|                   |                                 |              |                   | <b>mean</b> | <b>24209</b>                                  | <b>183.4</b>                                          | <b>202.9</b>                                          | <b>48.6</b>                                           | <b>1988</b>                                        |

## Supplementary References

1. Guillaume, T. et al. Carbon costs and benefits of Indonesian rainforest conversion to plantations. *Nature Communications* **9**, 2388 (2018).
2. Van Straaten, O. et al. Conversion of lowland tropical forests to tree cash crop plantations loses up to one-half of stored soil organic carbon. *Proceedings of the National Academy of Sciences of the USA* **112**, 9956-9960 (2015).
3. Hassler, E., Corre, M.D., Kurniawan, S. & Veldkamp, E. Soil nitrogen oxide fluxes from lowland forests converted smallholder rubber and oil palm plantations in Sumatra, Indonesia. *Biogeosciences* **14**, 2781-2798 (2017).
4. Mejjide, A. et al. Controls of water and energy fluxes in oil palm plantations: Environmental variables and oil palm age. *Agricultural and Forest Meteorology* **239**, 71-85 (2017).
